# Supplementary material
Source: PubMed Central journal article supplement (PMC58715)
Supplement: pnas_201413698_1.pdf [file pnas_201413698_1.pdf]

**Table 1.** List of specific primers for the amplification of the reassembled library.

---

|                     |                       |                                                            |
|---------------------|-----------------------|------------------------------------------------------------|
| <b>All library:</b> | N <sub>-for</sub>     | 5' ATAGATTTCAAGGAGACAGTCCATATG <sup>3'</sup>               |
|                     | N <sub>-rev</sub>     | 5' GCTAGTTATGCATGGTAGCACTAGTTCA <sup>3'</sup>              |
| <b>GP library:</b>  | N <sub>-forGART</sub> | 5' ATAGATTTCAAGGAGACAGTCCATATGGCC <sup>3'</sup>            |
|                     | N <sub>-revPurN</sub> | 5' GCGACTAGTTC <u>ACT</u> CGTCGGCAGCGTAGCCC <sup>3'</sup>  |
| <b>PG library:</b>  | N <sub>-forPurN</sub> | 5' ATAGATTTCAAGGAGACAGTCCATATGAAG <sup>3'</sup>            |
|                     | N <sub>-revGART</sub> | 5' GCTTACTAACTAGTTC <u>CATT</u> CCTCTTTAACCC <sup>3'</sup> |
| <b>GG library:</b>  | N <sub>-forGART</sub> | 5' ATAGATTTCAAGGAGACAGTCCATATGGCC <sup>3'</sup>            |
|                     | N <sub>-revGART</sub> | 5' GCTTACTAACTAGTTC <u>CATT</u> CCTCTTTAACCC <sup>3'</sup> |

---

The underlined sequences are Start/Stop codons; gene sequences specific to *purN* or *hGART* are shown in *italics*.
