# Supplementary material
Source: PubMed Central journal article supplement (PMC58715)
Supplement: pnas_201413698_4.pdf [file pnas_201413698_4.pdf]

**PGX-library**

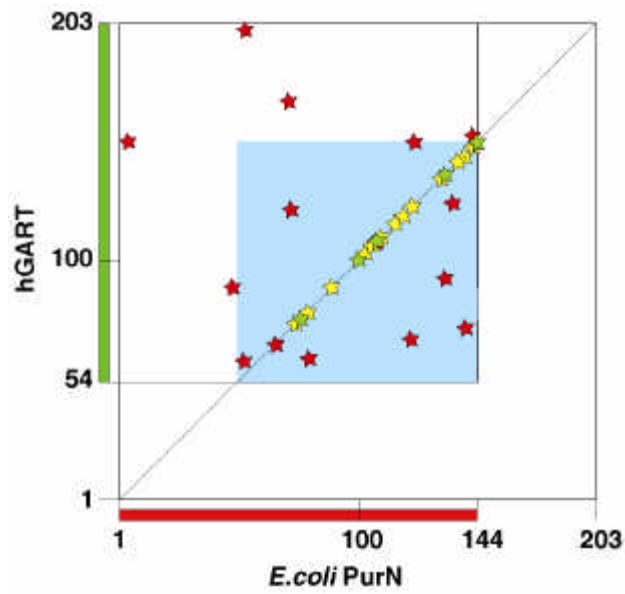

**GPX-library**

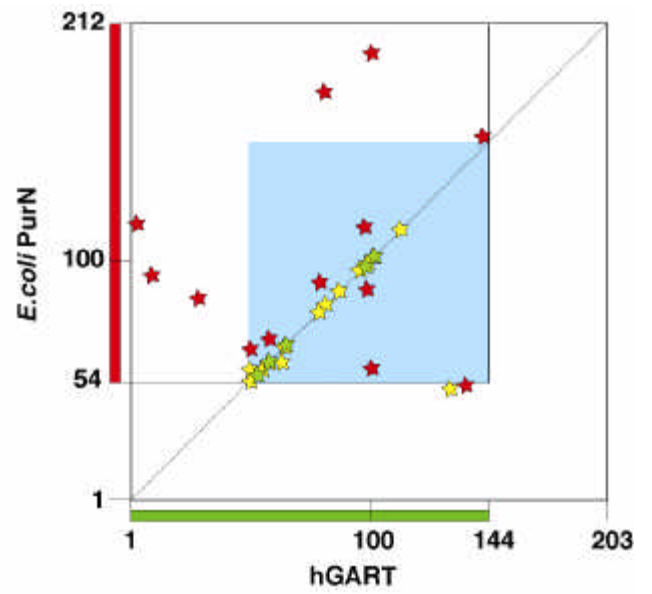

- ★ sampled functional hybrids for SCRATCHY
- ★ summary of naive incremental truncation libraries
- ★ summary of functional incremental truncation hybrids
