# Supplementary material
Source: PubMed Central journal article supplement (PMC58715)

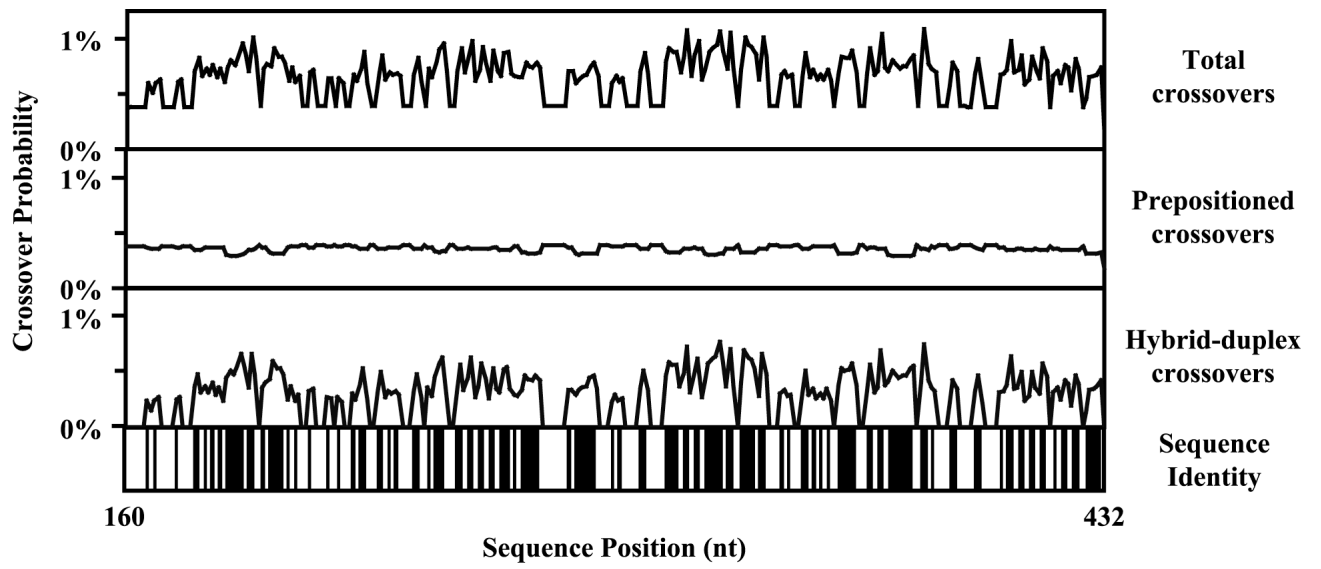

Supplement: pnas_201413698_5.pdf [file pnas_201413698_5.pdf]
